# Supplementary material
Source: ML conference proceedings conference paper supplement (https://proceedings.neurips.cc/paper_files/paper/2019/hash/7e9e346dc5fd268b49bf418523af8679-Abstract.html)
Supplement: Supplementary file 1 [file 7e9e346dc5fd268b49bf418523af8679-Supplemental.zip]

## A More Details of the LFP Experiment

In this section, we give some detail on the Sync-RKM model. In order to incorporate SyncNet model [21] into our framework, the weight  $W^{(x)} = [W^{(x_0)}, W^{(x-1)}, \dots, W^{(x-n+1)}]$  defined in Eq. (12) is parameterized as wavelet filters. If there is a total of  $K$  filters, then  $W^{(x)}$  is of size  $K \times C \times n$ . Specifically, suppose the  $n$ -gram input data at time  $t$  is given as  $X_t = [x_{t-n+1}, \dots, x_t] \in \mathbb{R}^{C \times n}$  with channel number  $C$  and window size  $n$ . The  $k$ -th filter for channel  $c$  can be written as

$$W_{kc}^{(x)} = \alpha_{kc} \cos(\omega_k t + \phi_{kc}) \exp(-\beta_k t^2) \quad (21)$$

$W_{kc}^{(x)}$  has the form of the Morlet wavelet base function. Parameters to be learned are  $\alpha_{kc}$ ,  $\omega_k$ ,  $\phi_{kc}$  and  $\beta_k$  for  $c = 1, \dots, C$  and  $k = 1, \dots, K$ .  $t$  is time grid of length  $n$ , which is a constant vector. In the recurrent cell, each  $W_{kc}^{(x)}$  is convolved with the  $c$ -th channel of  $X_t$  using 1-d convolution. Figure 1 gives the framework of this Sync-RKM model. For more details of how the filter works, please refer to the original work [21].

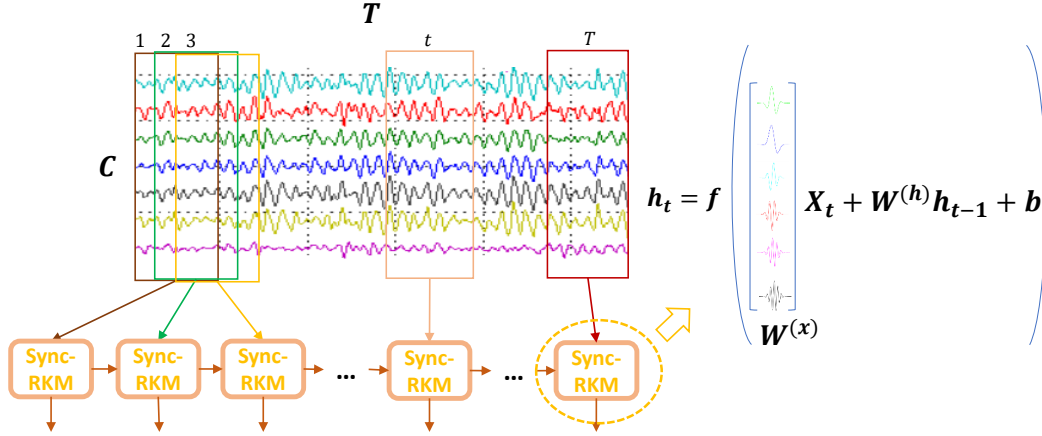

Figure 1: Illustration of the proposed model with SyncNet filters. The input LFP signal is given by the  $C \times T$  matrix. The SyncNet filters (right) are applied on signal chunks at each time step.

When applying the Sync-RKM model on LFP data, we choose the window size as  $n = 40$  to consider the time dependencies in the signal. Since the experiment is performed by treating each mouse as test iteratively, we show the subject-wise classification accuracy in Figure 2. The proposed model does consistently better across nearly all subjects.

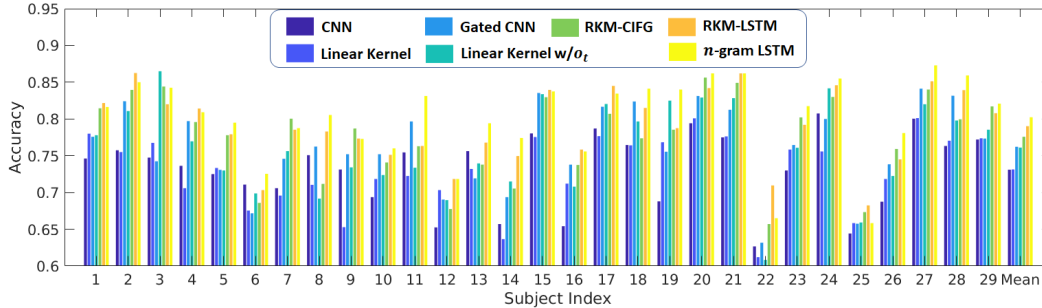

Figure 2: Subject-wise classification accuracy comparison for LFP dataset.
