# Supplementary material
Source: ML conference proceedings conference paper supplement (https://proceedings.neurips.cc/paper_files/paper/2019/hash/7e9e346dc5fd268b49bf418523af8679-Abstract.html)
Supplement: Supplementary file 2 [file 7e9e346dc5fd268b49bf418523af8679-Supplemental.zip]

Archive with 1 entries (1 files):
- Kernel_Based_Approaches_for_Sequence_Modeling__Connections_to_Neural_Methods_appendix.pdf
